# The PavA-like Fibronectin-Binding Protein of *Enterococcus faecalis*, EfbA, Is Important for Virulence in a Mouse Model of Ascending Urinary Tract Infection

Riccardo Torelli,<sup>1,a</sup> Pascale Serror,<sup>4,5,a</sup> Francesca Bugli,<sup>1</sup> Francesco Paroni Sterbini,<sup>1</sup> Ada Rita Florio,<sup>1</sup> Annarita Stringaro,<sup>3</sup> Marisa Colone,<sup>3</sup> Elena De Carolis,<sup>1</sup> Cecilia Martini,<sup>1</sup> Jean-Christophe Giard,<sup>6</sup> Maurizio Sanguinetti,<sup>1</sup> and Brunella Posteraro<sup>2</sup>

<sup>1</sup>Institute of Microbiology, and <sup>2</sup>Institute of Hygiene, Università Cattolica del Sacro Cuore, and <sup>3</sup>Department of Technology and Health, Istituto Superiore di Sanità, Rome, Italy; <sup>4</sup>INRA, UMR1319 Micalis, and <sup>5</sup>AgroParisTech, UMR Micalis, Jouy-en-Josas, and <sup>6</sup>Laboratoire de Microbiologie, EA 2128 Interactions Hôtes et Microorganismes des Épithéliums, CHU Côte de Nacre, Caen, France

*Enterococcus faecalis* is an established nosocomial pathogen, yet the pathogenesis of enterococcal infections, particularly of urinary tract infections (UTIs), remains to be fully elucidated. Fibronectin-binding proteins have been identified as potent adhesins in pathogenic Gram-positive cocci. Here, we characterized EfbA, which is encoded by the enterococcal orthologue of *Streptococcus pneumoniae* *pavA*. Similar to PavA, the anchorless EfbA protein was localized to the enterococcal cell outer surface and bound to immobilized human fibronectin. In addition to abrogated EfbA expression, deletion of the *efbA* gene eliminated EfbA from the cell surface and drastically reduced the enterococcal cell binding to immobilized fibronectin. The  $\Delta$ *efbA* deletion mutant was highly attenuated vs wild-type in a murine ascending UTI model, consistent with an increased tropism for the kidney relative to the bladder. These results provide the first evidence that EfbA of *E. faecalis* plays a role in UTIs, probably contributing to the pathogenesis in this site.

*Enterococcus faecalis* is an opportunistic pathogen that contributes to a large number of nosocomial infections worldwide [1]. In the United States, approximately 12% of hospital-acquired infections are caused by *Enterococcus* species [2], many of which are linked with resistance against multiple antibiotics [3], compromising effective therapy. Among hospitalized patients, *E. faecalis* is a common cause of urinary tract infections (UTIs) that most often lead to bacteremia, which is in turn associated with a high mortality rate [4].

Bacterial adherence is an important step in the process of disease that facilitates colonization of and translocation across the mucosal barrier, which eventually results in subcellular dissemination within the host [4]. Like other Gram-positive bacteria (eg, *Staphylococcus aureus*), *E. faecalis* is loaded with surface-exposed adhesins that mediate binding to human receptors or to various components of the extracellular matrix (ECM) and thus are called adhesins of the microbial surface component-recognizing adhesive matrix molecules (MSCRAMM) type [5]. These are cell wall-anchored surface proteins that have characteristic immunoglobulinlike folds [6].

In general, the function of *E. faecalis* cell surface structures has been poorly investigated, even with respect to UTIs [7–9]. In an ascending UTI model, the presence of enterococcal surface protein, encoded by an acquired gene, was shown to increase the persistence of bacteria in the urinary bladders of mice [7], whereas Kau et al [9] demonstrated that *E. faecalis* has

Received 5 January 2012; accepted 14 March 2012; electronically published 10 July 2012.

<sup>a</sup>R. T. and P. S. contributed equally to this study.

Correspondence: Maurizio Sanguinetti, MD, Institute of Microbiology, Università Cattolica del Sacro Cuore, Largo F Vito, 1 00168 Rome, Italy (msanguinetti@rm.unicatt.it).

The Journal of Infectious Diseases 2012;206:952–60

© The Author 2012. Published by Oxford University Press on behalf of the Infectious Diseases Society of America. All rights reserved. For Permissions, please e-mail: journals.permissions@oup.com.

DOI: 10.1093/infdis/jis440

greater tropism for the kidneys. Using a similar model, the MSCRAMM adhesion of collagen of *E. faecalis* (Ace) was recently identified as a putative virulence factor involved in colonization of the renal tissue [10].

In Gram-positive bacteria, adhesive properties have also been demonstrated for a newer class of surface proteins [11] that lack a typical signal sequence and the LPXTG cell wall anchorage motif [12]. One such protein is pneumococcal adherence and virulence factor A (PavA) from *Streptococcus pneumoniae*, which was not only shown to mediate pneumococcal binding to immobilized fibronectin but also identified as a pneumococcal virulence factor. Deficiency in PavA reduces the ability of pneumococci to adhere to or invade human epithelial and endothelial cells in vitro and attenuates virulence of pneumococci in mice infection models [13–15]. Another fibronectin-binding protein, Fbp54 from *Streptococcus pyogenes*, which shows 67% homology to PavA, also lacks localization features common to surface proteins of Gram-positive bacteria [16]. Notably, this protein was shown to be protective against the streptococcal challenge in a mouse model [17], underlining the biological importance of anchorless proteins [11].

In the present study, we report the first characterization of a PavA-like fibronectin-binding protein in *E. faecalis*, encoded by the EF1249 locus, which was termed enterococcal fibronectin-binding protein A (EfbA). We found that  $\Delta efbA$ , an isogenic deletion mutant of the *E. faecalis* strain JH2-2 [18], was abrogated in EfbA production thus resulting in a strongly diminished ability of the strain to bind to immobilized human fibronectin. This mutant was also attenuated in a mouse model of ascending UTI, providing strong evidence that EfbA plays a role in the pathogenesis of enterococcal UTIs.

## METHODS

### Bacterial Strains, Plasmids, and Growth Conditions

Bacterial strains and plasmids used in this study are listed in Table 1. *Enterococcus faecalis* strains included the wild-type JH2-2 and its derivatives and 15 fresh isolates recovered from clinical specimens (endocarditis, urine, urinary catheters, and wounds) at the Università Cattolica del Sacro Cuore of Rome, Italy. The strains were grown at 37°C in brain heart infusion (BHI) broth (Fluka), BHI plus 40% horse serum (Sigma) (BHI-S) broth, or, for some experiments, M17 medium supplemented with 0.5% glucose (GM17) and with erythromycin, when required. *Escherichia coli* strains were grown at 37°C in Luria–Bertani broth containing chloramphenicol (10 µg/mL) and ampicillin (50 µg/mL).

### Construction of *efbA* Mutant and Complemented Strains

To construct a  $\Delta efbA$  deletion mutant of *E. faecalis* JH2-2, 2 DNA fragments corresponding to the chromosomal DNA regions upstream (including the start codon and the 5' part of the coding sequence) and downstream (including the 3' part of the gene and the stop codon) of *ef1249* (Figure 1) were polymerase chain reaction (PCR) amplified from JH2-2 genomic DNA using primers designed on the basis of the genome sequence of *E. faecalis* V583 strain [19] with flanking restriction sites (see Supplementary Table 1). After digestion with *Sall*, the 2 PCR products were self-ligated in order to create a copy of the EF1249 gene deleted for an internal fragment of 1481 base pairs (approximately 86%); digested by appropriate restriction enzymes; cloned into plasmid pMAD, a thermosensitive pE194<sup>ts</sup>-based delivery vector system [20]; and finally

**Table 1. Bacterial Strains and Plasmids Used in This Study**

| Strain or Plasmid            | Relevant Characteristic(s) <sup>a</sup>                                                                               | Reference or Source |
|------------------------------|-----------------------------------------------------------------------------------------------------------------------|---------------------|
| <b>Strains</b>               |                                                                                                                       |                     |
| <i>Enterococcus faecalis</i> |                                                                                                                       |                     |
| JH2-2                        | Fus <sup>r</sup> Rif <sup>r</sup> ; plasmid-free wild-type strain                                                     | [18]                |
| $\Delta efbA$                | JH2-2 isogenic derivative EF1249 deletion mutant                                                                      | This study          |
| <i>efbA</i> complemented     | <i>efbA</i> deletion mutant complemented with <i>efbA</i>                                                             | This study          |
| <i>Escherichia coli</i>      |                                                                                                                       |                     |
| TOP10                        | <i>E. coli</i> host strain for routine cloning                                                                        | Invitrogen          |
| M15[pREP4]                   | <i>E. coli</i> host strain for high-level recombinant protein expression                                              | Stratagene          |
| <b>Plasmids</b>              |                                                                                                                       |                     |
| pMAD                         | oriP194 <sup>ts</sup> , Em <sup>r</sup> Amp <sup>r</sup> <i>bgaB</i>                                                  | [20]                |
| pMAD- $\Delta$ EF1249        | pMAD carrying EF1249 deletion                                                                                         | This study          |
| pMAD-EF1249                  | pMAD carrying functional EF1249 allele                                                                                | This study          |
| pQE31                        | Expression vector for x6His-tagged fusion proteins, Amp <sup>r</sup>                                                  | This study          |
| pQE31-EfbA                   | pQE31 derivative plasmid carrying a <i>Sall/HindIII</i> restriction fragment containing the complete <i>efbA</i> gene | This study          |

Abbreviations: Amp, ampicillin; *bgaB*, *Bacillus stearothermophilus* gene encoding a thermostable  $\beta$ -galactosidase; Em, erythromycin; Fus, fusidic acid; Rif, rifampin.

<sup>a</sup> Superscripts “r” and “ts” indicate resistance and temperature-sensitivity, respectively.

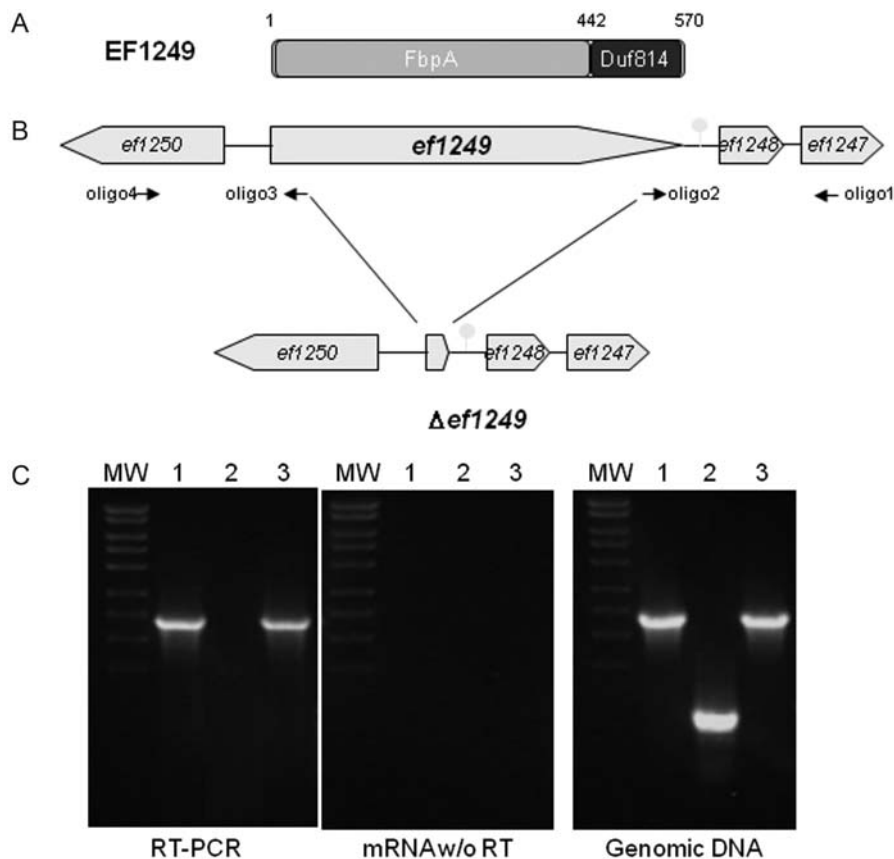

**Figure 1.** Schematic representation and transcriptional analysis of the deleted *efbA* locus of JH2-2. *A*, Genetic organization of the EF1249 region showing 2 Pfam domains, 1 of which is predicted to be involved in fibronectin binding (FbpA) and the other of which is systematically associated with the FbpA domain (Duf814). *B*, Depiction of the directions of transcription of the various genes and the positions of primer pairs oligo1/oligo2 and oligo3/oligo4 for polymerase chain reaction (PCR) amplification reactions used to generate strain  $\Delta efbA$ . The putative transcriptional terminator is indicated by a lollipop. A sequence of 1713 base pairs containing the complete *efbA* gene was deposited in GenBank (accession number JQ063119). *C*, Reverse transcription PCR (RT-PCR) analysis of *efbA* gene expression of wild-type JH2-2 (lane 1) and its isogenic  $\Delta efbA$  (lane 2) and *efbA*-complemented (lane 3) mutant strains. Gel on left, RT-PCR of total RNA isolated from mid-exponential phase cells and treated with DNase; gel on middle, control reaction with mRNA not subjected to RT as template; gel on right, control reaction with genomic DNA as template. Abbreviations: mRNA, messenger RNA; MW, molecular weight marker.

transformed into electrocompetent cells of *E. coli* Top10 (Invitrogen), as described previously [21]. The recombinant plasmid, pMAD- $\Delta$ EF1249, was then electroporated into JH2-2 cells. Gene replacement was performed via a double-crossover event by a method based on the conditional replication of the pMAD plasmid [22], in which transformants were grown at the permissive temperature (30°C) on GM17 plates with erythromycin (100  $\mu$ g/mL) and then shifted to the nonpermissive temperature (42°C) in the presence of erythromycin to select single-crossover integrants. Plasmids excision by a second recombinant event was stimulated by growing integrants for 4 hours at 30°C, followed by overnight incubation at 42°C without erythromycin to select an *ef1249* double-crossover mutation. Successful targeted mutation of *ef1249* in strain  $\Delta efbA$  (Table 1) was confirmed by PCR, sequencing, and Southern blot analysis (results not shown).

For complementation, the entire *ef1249* region was amplified from JH2-2 genomic DNA (see [Supplementary Table 1](#) for primers) and cloned in pMAD [10]. The resulting plasmid, pMAD-EF1249, was confirmed by sequencing and then electroporated into the  $\Delta efbA$  deletion mutant to create the *efbA* complemented strain (Table 1).

#### Expression, Purification, and Immunoblot Analysis of Recombinant EfbA

Expression and purification of EfbA was performed as described previously [23]. Briefly, the entire EfbA coding region was PCR amplified from JH2-2 DNA using primers properly designed to generate a PCR product with *Sall* and *HindIII* sites at their respective 5' and 3' ends (see [Supplementary Table 1](#)). This product was digested with *Sall* and *HindIII*, cloned into pQE31 (Qiagen), and transformed into *E. coli* M15 (pREP4)

(Qiagen). Induction of N-terminally x6His-tagged EfbA expression was obtained with isopropyl- $\beta$ -D-thiogalactopyranoside at a final concentration of 1 mM. The recombinant EfbA (rEfbA) protein was purified by nickel column chromatography using Ni-NTA Agarose (Qiagen), and protein concentration was determined using the bicinchoninic acid protein assay (Pierce Chemical). After visualization on a sodium dodecyl sulfate 10% polyacrylamide gel, the eluted rEfbA was dialyzed against phosphate-buffered saline (PBS) and transferred to Hybond-P polyvinylidene difluoride membranes (GE Healthcare) by electroblotting. To detect rEfbA, blots were blocked with 4% skim milk (Sigma) in PBS and 0.05% Tween 20 (PBS-T), incubated at 37°C for 2 hours with 1:1000 dilution of anti-(H)5 mouse antibodies (Penta-His Antibody; Qiagen). The blots were then washed with PBS-T and incubated at room temperature for 1 hour with horseradish peroxidase (HRP)-conjugated goat antimouse secondary antibodies (Sigma) diluted 1:10 000 in PBS-T. Antibody binding was detected using 3, 3', 5, 5'-tetramethylbenzidine liquid substrate (Sigma) according to the manufacturer's instructions.

#### Quantitative Real-Time Reverse Transcription PCR

To test *efbA* gene expression levels in JH2-2 and in the  $\Delta$ *efbA* deletion mutant during growth in BHI and BHI-S at 37°C, total RNA was extracted from exponential-phase enterococcal cultures with an RNeasy minikit (Qiagen), which includes an RNase-free DNase treatment step to eliminate DNA. Quantitative real-time reverse transcription PCR (RT-PCR) was performed in an iCycler iQ system (Bio-Rad Laboratories), using *rpoB* as the normalization gene [24], with primers (see Supplementary Table 1) that were designed to produce amplicons of similar lengths using Beacon Designer 7 software (Premier Biosoft International). The relative messenger RNA (mRNA) expression level of the target gene in each sample was calculated using the comparative cycle-threshold method [25].

#### Enzyme-Linked Immunosorbent Assay (ELISA) and Whole-Cell ELISA

Binding of rEfbA to collagen types I and IV (human placenta; Sigma), fibronectin (human plasma; Enzyme Research Laboratories), and laminin (human placenta; Sigma) was measured essentially as described elsewhere [26]. High-binding microtiter plate (Immulon 2 HB; Corning) wells were coated overnight at 4°C with 10  $\mu$ g/mL of each ECM protein, and bovine serum albumin (BSA; Sigma) was used as a negative control. After washing the wells and blocking the remaining protein-binding sites by 1% BSA and 0.1% Tween 20 in PBS (blocking buffer), amounts of up to 0.5  $\mu$ g of rEfbA diluted in blocking buffer were added to the wells and incubated at 37°C for 2 hours. The wells were then washed with 0.1% Tween 20 to remove unbound protein, and bound rEfbA was detected by

the mouse anti-(H)5 primary antibody and goat antimouse secondary antibody conjugated to HRP.

Binding of *E. faecalis* strains to the immobilized ECM proteins (all 20  $\mu$ g/mL) was determined by whole-cell ELISA, using a previously described protocol [27] with some modifications. Briefly, bacteria were collected from overnight cultures in BHI-S, washed with PBS (pH 7.4), and resuspended in PBS to an optical density at 600 nm ( $OD_{600}$ ) of 0.5, and 100  $\mu$ L was added to wells of a microtiter plate and allowed to bind overnight at 4°C. The wells were washed and subsequently blocked with blocking buffer for 1 hour at 37°C. Binding of *E. faecalis* strains was assayed by incubation for 1 hour at 37°C with an antienterococcus serum, which was raised in rabbit against formalin-killed whole cells of the *E. faecalis* strain  $\Delta$ *efbA* (Table 1). Bound antibodies were detected by incubation with an HRP-conjugated goat antirabbit immunoglobulin G (Millipore).

For both types of ELISA, the absorbance was measured at 450 nm with an ELISA reader.

#### Immunofluorescence and Immunoelectron Microscopy

Immunofluorescence staining was performed as described previously [24]. Briefly, whole cells of an enterococcal exponential-phase culture in BHI-S were fixed with PBS containing 4% paraformaldehyde for 5 minutes, then incubated overnight with a polyclonal antiserum against rEfbA (which was generated in mouse by routine immunological techniques) diluted 1:500 in PBS–0.5% BSA. After washing with PBS, bound antibodies were detected by incubation for 1 hour with Alexa 488-coupled antimouse antibodies (Sigma) diluted 1:200 in PBS–0.5% BSA. After the cells were washed with PBS and resuspended in 100  $\mu$ L of PBS, a 15- $\mu$ L sample was applied to a glass slide, air dried, and heat fixed. Analysis was performed with a confocal microscope (Olympus Fluoview IX70). Preimmune antiserum from the same animal was used as a negative control, whereas the rabbit antienterococcus serum (see above) was included as a positive control.

For immunoelectron microscopy studies, enterococci were harvested by centrifugation from exponential-phase cultures in BHI-S and washed with PBS. Ultrathin sections were obtained according to a well-developed procedure [28]. Immunogold labeling was performed as described previously [29], using the anti-EfbA serum (1:100 dilution) or preimmune antiserum (1:100 dilution) followed by 10-nm gold-goat antimouse immunoglobulin G (1:20 dilution) (Sigma). Samples were examined in a Philips 208 transmission electron microscope (FEI Company).

#### Mouse UTI Model of Virulence

The mouse UTI infection experiments were performed by following the protocol described by Singh et al [30] and already adopted by us [10], under the approval of the Università

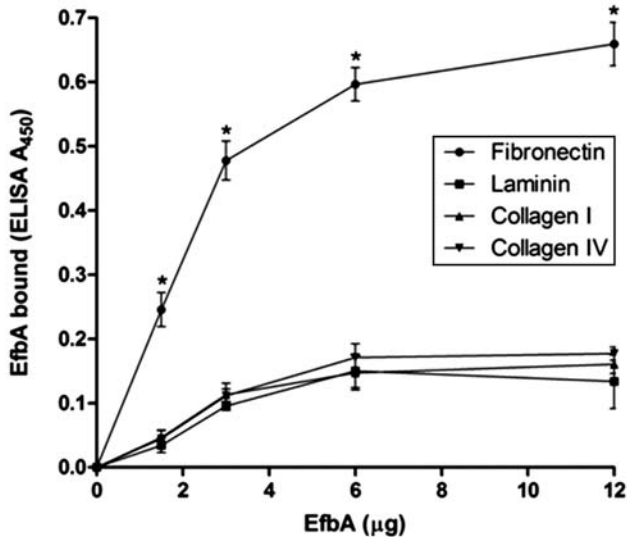

**Figure 2.** Binding of recombinant EfbA (rEfbA) to immobilized components of the extracellular matrix (ECM). The concentration-dependent binding was measured by enzyme-linked immunosorbent assay (ELISA) using x6His immunoglobulin G–horseradish peroxidase antibodies. Data points represent the mean  $\pm$  standard deviations (results are from 3 independent experiments with 2 different purified rEfbA protein batches). Mean absorbance values from the different ECM proteins were compared using unpaired *t* test; \**P* < .0001.

Cattolica del Sacro Cuore of Rome Institutional Animal Use Committee. Briefly, groups of 15 female BALB/c mice weighing 20–25 g each were transurethrally challenged with approximately  $1 \times 10^4$  colony-forming units (CFUs) of wild-type JH2-2 and its derivatives (Table 1). At 48 hours after infection, bladder and kidney pair cultures were prepared from mice that had been humanely killed to determine the recovered CFUs from organ homogenates.

### Statistical Analysis

Statistical comparisons were performed with GraphPad Prism software (version 4.03 for Windows). Differences were considered significant when *P* < .05.

## RESULTS

### Characterization of EfbA, a Novel *E. faecalis* Cell-Surface Protein

*In silico* search of the genome sequence of *E. faecalis* strain V583 [19] revealed a 1713–base pair gene, *ef1249*, which encodes a 570 amino acid residue protein showing 51% identity (71% similarity) to *S. pneumoniae* PavA [13]. The analysis of 15 clinical isolates of *E. faecalis* for the presence of *ef1249* by using PCR amplification with primers designed to amplify the complete coding region demonstrated that *ef1249* was found in all (not shown). The putative EF1249 protein is

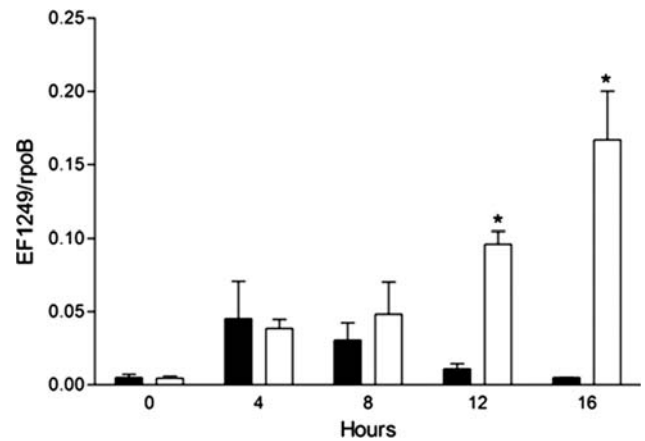

**Figure 3.** Expression of the *efbA* gene in the *Enterococcus faecalis* JH2-2 gene grown in brain heart infusion broth (BHI) (black bars) or in BHI plus 40% horse serum (white bars) as assessed by real-time reverse transcription polymerase chain reaction. The level of the *efbA* transcript was tested in triplicate and normalized using the *rpoB* transcript level. Asterisks indicate points of statistical significance in comparison with the values for the BHI-grown strains; \**P* < .05, Mann–Whitney test.

composed of an N-terminal fibronectin-binding domain (Pfam PF05833), followed by a conserved domain of unknown function including the conserved motif (D/E)X(W/Y)XH (Duf814). EF1249, designated EfbA because of its inferred role in the enterococcal fibronectin binding, contains 60 Leu residues, 48 Lys residues, and 45 Glu residues. The high preponderance of Leu residues was previously noted not only for PavA [13] but also for *S. pyogenes* Fbp54 [16, 31]. Similar to PavA, EfbA had no conventional leader sequence required for protein export via the general secretory pathway and no described motif involved in the localization of cell surface-exposed proteins (eg, LPXTG). According to the genetic structure of the locus and the predicted sites of transcriptional start and termination of *efbA*, RT-PCR analysis of *E. faecalis* JH2-2 RNA allowed us to obtain an expected-size PCR product corresponding to an approximately 1.7 kb mRNA (Figure 1).

Full-length recombinant N-terminally x6His-tagged EfbA protein was purified from *E. coli* and was shown to bind avidly to human fibronectin immobilized onto microtiter plate wells (Figure 2). Binding of rEfbA to fibronectin was saturable, and maximal binding levels were dependent upon the amounts of fibronectin immobilized (not shown). By contrast, we detected significantly reduced binding to immobilized collagen type I, collagen type IV, and laminin (*P* < .0001) (Figure 2).

Recent work aimed at identifying parameters that promote *E. faecalis* adherence to ECM components demonstrated that growth in 40% horse serum elicited adherence to fibronectin (and fibrinogen) but not to elastin and BSA [32]. To test whether EfbA is a serum-inducible protein, we examined the

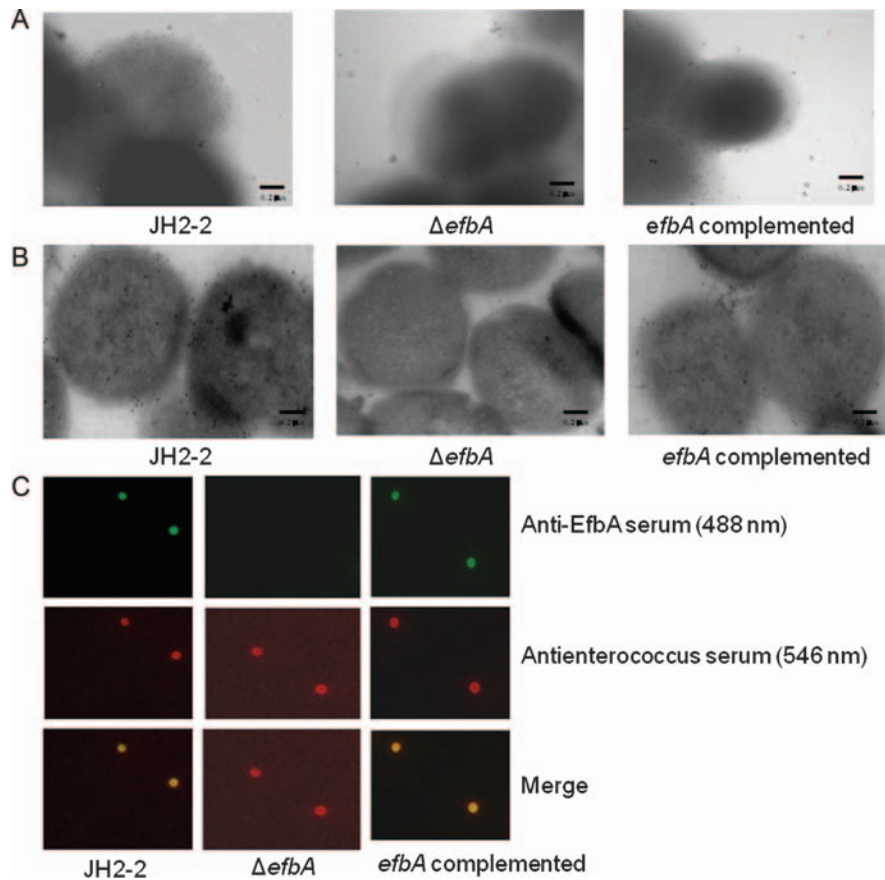

**Figure 4.** Immunoelectron microscopy and immunofluorescence studies of *Enterococcus faecalis* JH2-2,  $\Delta$ efbA, and efbA-complemented strains. *A*, Visualization of EfbA on the bacterial cell surface by labeling with anti-EfbA serum and protein A-10 nm gold particles. *B*, Ultrathin sections of the samples shown in *A*. *C*, Immunofluorescence microscopy of the enterococcal strains labeled only with Alexa Fluor 488 (red fluorescence) or 546 (green fluorescence) or with both (yellow, merged fluorescence). The  $\Delta$ efbA cells are labeled only with Alexa Fluor 488 and show only red fluorescence.

efbA expression in *E. faecalis* JH2-2 after growth at 37°C in BHI broth or the same medium supplemented with horse serum at the above cited concentration (BHI-S). At 4 different time points—early exponential (OD<sub>600</sub> = 0.3 after 4 hours), exponential (OD<sub>600</sub> = 0.8 after 8 hours), early stationary (OD<sub>600</sub> = 1.0 after 12 hours), and stationary (OD<sub>600</sub> ≥ 1.0 after 16 hours) phases of growth—cells were harvested, and transcription of efbA was analyzed by real-time RT-PCR. In the BHI-S-grown cells, transcripts of efbA were detected in all phases of growth, and the expression levels increased significantly at the stationary phase (Figure 3). In the BHI-grown cells, the efbA expression amounts observed at 4, 8, and 12 hours were respectively 9.1-, 6.4-, and 2.1-fold of that observed at the 0-hour time point.

Next, to prove that EfaA is a surface-exposed protein, localization of EfbA was determined via immunogold labeling experiments using a specific mouse antiserum. The results demonstrated that EfbA was present on the cell surface of JH2-2 cells grown in BHI-S; ultrathin sections of these

specimens showed relatively uniform distribution of the gold particles around the bacterial cell surface (Figure 4*A* and *B*). Accordingly, immunofluorescence studies using the anti-EfbA serum confirmed the presence of EfbA on the cell surfaces of both strains of JH2-2 and the reconstituted mutant (Figure 4*C*). No surface localization of EfbA was detected in the  $\Delta$ efbA deletion mutant cells (Figure 4*A–C*).

#### Effect of EfbA Gene Deletion on Adherence of *E. faecalis* to Fibronectin

To assess the role of EfbA in the interaction of *E. faecalis* cells with ECM molecules, we investigated the ability of wild-type JH2-2 and its isogenic strain  $\Delta$ efbA to bind to fibronectin and the other ECM protein components (Figure 5). Whole-cell ELISA analysis in which fibronectin, laminin, collagen type I, collagen type IV, and BSA (negative control) were immobilized showed that the  $\Delta$ efbA cells displayed significantly reduced binding only to fibronectin (8.7-fold;  $P < .0001$ ), suggesting that EfbA promotes specific adherence of *E. faecalis*

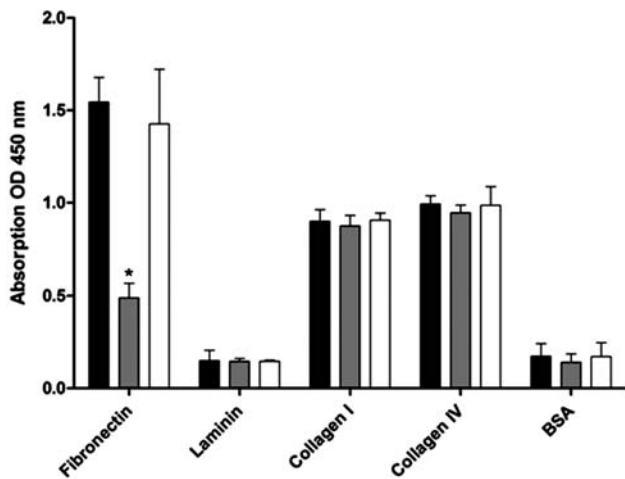

**Figure 5.** Adherence of *Enterococcus faecalis* JH2-2 and its isogenic mutant strains,  $\Delta efbA$  and the *efbA* complemented to immobilized ECM proteins by whole-cell enzyme-linked immunosorbent assay. Fibronectin, laminin, collagen type I, collagen type IV, and bovine serum albumin (BSA) (negative control) were immobilized on a microplate plate, and JH2-2 (black bars),  $\Delta efbA$  (gray bars), and *efbA*-complemented (white bars) cells grown in brain heart infusion broth plus 40% horse serum were added to the wells and allowed to bind to these components. Adherent bacteria were detected using an anti-EfbA antiserum followed by goat antimouse immunoglobulin G–horseradish peroxidase antibodies. Means of adherence percentages of different strains were compared using analysis of variance and Bonferroni's posttest; \* $P < .0001$ . Abbreviation: OD, optical density

cells to fibronectin. As expected, complementation of the  $\Delta efbA$  deletion mutant with plasmid pMAD-EF1249 resulted in restoration of the fibronectin adherence phenotype to levels equal to that of the wild-type strain (Figure 5).

#### Attenuation of *E. faecalis* Virulence in the Mouse Model of Ascending UTIs

To test the effect of deletion on the ability of *E. faecalis* to cause UTIs, we used a mouse model of ascending infection to compare JH2-2 and the  $\Delta efbA$  deletion mutant for virulence. Mice ( $n = 15$ ) were infected via intraurethral catheterization with  $1 \times 10^4$  CFUs of each enterococcal strain, and at 48 hours, the mean (geometric) CFUs recovered from kidney pairs and bladders were enumerated. As shown in Figure 6, the  $\log_{10}$  CFUs (per gram of tissue) of bacteria recovered from the kidneys infected by JH2-2 were significantly higher than that recovered from the kidneys infected by the  $\Delta efbA$  strain ( $3.8 \times 10^6$  vs  $2.6 \times 10^5$ , respectively;  $P = .002$ ). Again, a comparison of the mean  $\log_{10}$  CFUs of bacteria recovered from the bladders showed that the differences between JH2-2 and the  $\Delta efbA$  mutant ( $0.65 \log_{10}$ ;  $P = .01$ ) were statistically significant, but to a lower extent. These results are consistent with an increased tropism of *E. faecalis* for the kidney relative to the

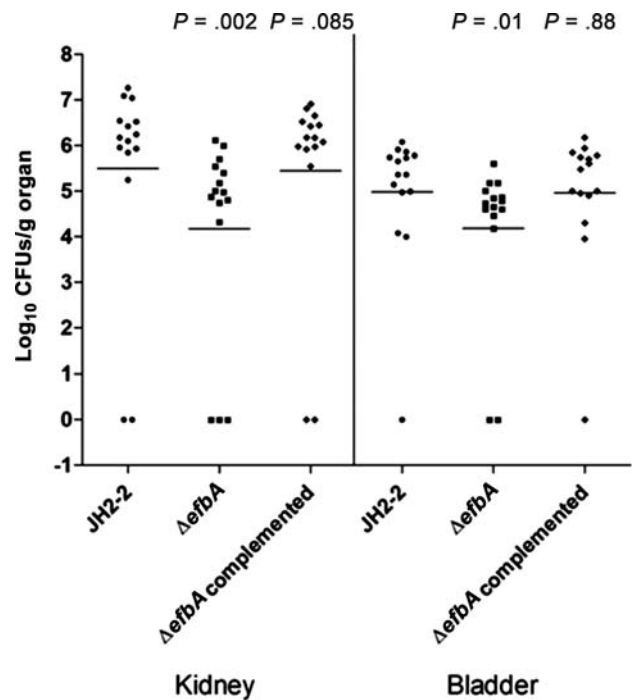

**Figure 6.** Effect of deletion of *efbA* in a mouse model of urinary tract infection. Groups of 15 BALB/c mice were transurethrally challenged with approximately  $1 \times 10^4$  cells of the indicated strains. Data are expressed as the  $\log_{10}$  colony-forming units (CFUs)/g of bacteria recovered from kidney and urinary bladder homogenates 48 hours after the challenge. The  $\log_{10}$  CFUs from both kidneys were combined and averaged. A value of 0 was assigned to uninfected organs. Horizontal bars represent geometric means.  $\log_{10}$  counts were compared for statistical significance by the paired *t* test.

bladder, thereby indicating that the *efbA* gene contributes significantly to ascending UTIs.

## DISCUSSION

Fibronectin acts as a molecular bridge for the adherence of several Gram-positive cocci, including streptococci and staphylococci [33], and it is also considered a signal transduction trigger leading to bacterial host invasion [34]. Whereas cell-wall attached fibronectin-binding proteins are recognized as important multifunctional virulence factors of *S. aureus* [35], *Enterococcus faecium* [27], and *Streptococcus pyogenes* [36], anchorless but surface-exposed adhesins (and invasins) have emerged as a new class of virulence factors, particularly for *S. pyogenes* and *S. pneumoniae* [11].

We described the first characterization of an *E. faecalis* fibronectin-binding adhesin, which does not possess a signal sequence or an LPXTG-mediated membrane anchor but is localized on the bacterial surface. This protein, named EfbA, was identified in *E. faecalis* by sequence homology with Pava

from *S. pneumoniae*, a well-known anchorless but surface-located protein that is essential for pneumococcal adherence and virulence [13–15].

Initial studies on the *E. faecalis* adhesion to ECM proteins classified this organism as nonadherent to fibronectin (and fibrinogen) [37], but stressful environmental conditions (ie, after growth at 46°C or in presence of serum) were then shown to increase the binding of *E. faecalis* to collagen type I, collagen type IV, and laminin [38]. This conditional adherence phenotype, for which bacteria grown in broth under conventional in vitro conditions do not adhere efficiently to the different ECM components, underscored an apparently stringent regulation of the expression of *E. faecalis* adhesins and thus complicated the identification of these proteins [6]. Finally, Nallapareddy and Murray [32] demonstrated the enhancing effect of serum on adherence of *E. faecalis* to fibronectin and, interestingly, that the serum-elicited enhancement of fibronectin adherence is a general phenomenon of *E. faecalis*. The same authors hypothesized that other putative MSCRAMMs (up to 8 predicted MSCRAMM-encoding genes are found in clinical *E. faecalis* strains [6]) other than Ace [38] could be implied in the adherence to fibronectin (and fibrinogen) [32]. Surprisingly, our EfbA does not belong to the MSCRAMM protein family.

We showed that the *E. faecalis* wild-type strain JH2-2 was able to express an EfbA surface component that specifically recognizes fibronectin only after growth in 40% horse serum because *efbA* transcription was minimal after growth in standard laboratory media (ie, BHI). The production of EfbA after growth in the presence of serum was demonstrated by immunoelectron and immunofluorescence microscopic analyses, mirroring the increased *efbA* mRNA levels observed in this in vitro condition. By contrast, the  $\Delta$ *efbA* deletion mutant strain showed a significantly reduced binding to fibronectin, consistent with the disappearance of EfbA from its cell surface. Thus, we assigned a fibronectin binding function to EfbA, thereby expanding the knowledge of *E. faecalis* adherence to individual ECM proteins.

We assessed whether the adherence of EfbA to fibronectin could be related to the propensity of *E. faecalis* to cause hospital-acquired UTIs. It is known that MSCRAMM genes, of which one encodes Ace and 3 form the *ebp* operon encoding endocarditis and biofilm-associated pilus [39], play an important role in animal models of *E. faecalis* infections, including infective endocarditis and UTIs [10, 30, 39]. Using a robust murine model of *E. faecalis* UTI [9], we showed that deletion of *efbA* resulted in clear attenuation in the ability of JH2-2 to cause infection. Thus, markedly more JH2-2 CFUs than  $\Delta$ *efbA* deletion mutants were recovered in both kidneys (14.7-fold) and bladders (4.6-fold), reflecting increased tropism of *E. faecalis* strain JH2-2 for the kidney relative to the bladder, as observed previously [9, 30].

Because EfbA displays similarities with another atypical surface protein, the fibronectin-binding PavA of *S. pneumoniae*, it is conceivable that they both exhibit functions in addition to fibronectin adherence. In this context, PavA was shown to be involved in successful colonization of mucosal surfaces and in translocation of pneumococci across host barriers, perhaps by escaping phagocytosis or modulating immune responses [40]. It is of significance to this report that very recent work has demonstrated that most MSCRAMMs and cell-wall anchor family proteins [6] were not differentially regulated or downregulated during growth of *E. faecalis* in human urine in vitro [41]. Similar to PavA, EfbA may be a key virulence determinant of enterococci under in vivo conditions and hence contribute to the pathogenesis of UTIs. Nonetheless, the role of EfbA in the *E. faecalis* pathogenicity remains to be deciphered.

## Supplementary Data

Supplementary materials are available at *The Journal of Infectious Diseases* online (<http://jid.oxfordjournals.org/>). Supplementary materials consist of data provided by the author that are published to benefit the reader. The posted materials are not copyedited. The contents of all supplementary data are the sole responsibility of the authors. Questions or messages regarding errors should be addressed to the author.

## Notes

**Financial support.** This work was supported by grants from the Università Cattolica del Sacro Cuore (Fondi Linea DI, 2010–2011) to M. S. and B. P.

**Potential conflicts of interest.** All authors: No reported conflicts. All authors have submitted the ICMJE Form for Disclosure of Potential Conflicts of Interest. Conflicts that the editors consider relevant to the content of the manuscript have been disclosed.

## References

1. Fisher K, Phillips C. The ecology, epidemiology and virulence of *Enterococcus*. *Microbiology* **2009**; 155:1749–57.
2. Hidron AI, Edwards JR, Patel J, et al. NHSN annual update: antimicrobial-resistant pathogens associated with healthcare-associated infections: annual summary of data reported to the National Healthcare Safety Network at the Centers for Disease Control and Prevention, 2006–2007. *Infect Control Hosp Epidemiol* **2008**; 29:996–1011.
3. Woodford N, Livermore DM. Infections caused by gram-positive bacteria: a review of the global challenge. *J Infect* **2009**; 59:S4–16.
4. Koch S, Hufnagel M, Theilacker C, Huebner J. Enterococcal infections: host response, therapeutic, and prophylactic possibilities. *Vaccine* **2004**; 22:822–30.
5. Sava IG, Heikens E, Huebner J. Pathogenesis and immunity in enterococcal infections. *Clin Microbiol Infect* **2010**; 16:533–40.
6. Sillanpää J, Xu Y, Nallapareddy SR, Murray BE, Höök M. A family of putative MSCRAMMs from *Enterococcus faecalis*. *Microbiology* **2004**; 150:2069–78.
7. Shankar N, Lockett CV, Baghdayan AS, Drachenberg C, Gilmore MS, Johnson DE. Role of *Enterococcus faecalis* surface protein Esp in the pathogenesis of ascending urinary tract infection. *Infect Immun* **2001**; 69:4366–72.
8. Johnson JR, Clabots C, Hirt H, Waters C, Dunny G. Enterococcal aggregation substance and binding substance are not major contributors to urinary tract colonization by *Enterococcus faecalis* in a mouse



- model of ascending unobstructed urinary tract infection. *Infect Immun* **2004**; 72:2445–8.
9. Kau AL, Martin SM, Lyon W, Hayes E, Caparon MG, Hultgren SJ. *Enterococcus faecalis* tropism for the kidneys in the urinary tract of C57BL/6J mice. *Infect Immun* **2005**; 73:2461–8.
  10. Lebreton F, Riboulet-Bisson E, Serron P, et al. Ace, which encodes an adhesin in *Enterococcus faecalis*, is regulated by Ers and is involved in virulence. *Infect Immun* **2009**; 77:2832–9.
  11. Chhatwal GS. Anchorless adhesins and invasins of gram-positive bacteria: a new class of virulence factors. *Trends Microbiol* **2002**; 10:205–8.
  12. Fischetti VA, Pancholi V, Schneewind O. Conservation of a hexapeptide sequence in the anchor region of surface proteins from gram-positive cocci. *Mol Microbiol* **1990**; 4:1603–5.
  13. Holmes AR, McNab R, Millsap KW, et al. The *pavA* gene of *Streptococcus pneumoniae* encodes a fibronectin-binding protein that is essential for virulence. *Mol Microbiol* **2001**; 41:1395–408.
  14. Pracht D, Elm C, Gerber J, et al. PavA of *Streptococcus pneumoniae* modulates adherence, invasion, and meningial inflammation. *Infect Immun* **2005**; 73:2680–9.
  15. Kadioglu A, Brewin H, Härtel T, et al. Pneumococcal protein PavA is important for nasopharyngeal carriage and development of sepsis. *Mol Oral Microbiol* **2010**; 25:50–60.
  16. Courtney HS, Dale JB, Hasty DI. Differential effects of the streptococcal fibronectin-binding protein, FBP54, on adhesion of group A streptococci to human buccal cells and HEp-2 tissue culture cells. *Infect Immun* **1996**; 64:2415–9.
  17. Kawabata S, Kunitomo E, Terao Y, et al. Systemic and mucosal immunizations with fibronectin-binding protein FBP54 induce protective immune responses against *Streptococcus pyogenes* challenge in mice. *Infect Immun* **2001**; 69:924–30.
  18. Jacob AE, Hobbs SJ. Conjugal transfer of plasmid-borne multiple antibiotic resistance in *Streptococcus faecalis* var. *zymogenes*. *J Bacteriol* **1974**; 117:360–72.
  19. Paulsen IT, Banerjee L, Myers GS, et al. Role of mobile DNA in the evolution of vancomycin-resistant *Enterococcus faecalis*. *Science* **2003**; 299:2071–4.
  20. Arnaud M, Chastanet A, Débarbouillé M. New vector for efficient allelic replacement in naturally nontransformable, low-GC-content, gram-positive bacteria. *Appl Environ Microbiol* **2004**; 70:6887–91.
  21. Hébert L, Courtin P, Torelli R, et al. *Enterococcus faecalis* constitutes an unusual bacterial model in lysozyme resistance. *Infect Immun* **2007**; 75:5390–8.
  22. Verneuil N, Mazé A, Sanguinetti M, et al. Implication of (Mn)superoxide dismutase of *Enterococcus faecalis* in oxidative stress responses and survival inside macrophages. *Microbiology* **2006**; 152:2579–89.
  23. De Carolis E, Posteraro B, Florio AR, et al. Analysis of heat-induced changes in protein expression of *Stenotrophomonas maltophilia* K279a reveals a role for GroEL in the host-temperature adaptation. *Int J Med Microbiol* **2011**; 301:273–81.
  24. Brinster S, Posteraro B, Bierne H, et al. Enterococcal leucine-rich repeat-containing protein involved in virulence and host inflammatory response. *Infect Immun* **2007**; 75:4463–71.
  25. Meijerink J, Mandigers C, van de Locht L, Tönnissen E, Goodsaid F, Raemaekers J. A novel method to compensate for different amplification efficiencies between patient DNA samples in quantitative real-time PCR. *J Mol Diagn* **2001**; 3:55–61.
  26. Nallapareddy SR, Singh KV, Sillanpää J, Zhao M, Murray BE. Relative contributions of Ebp pili and the collagen adhesin Ace to host extracellular matrix protein adherence and experimental urinary tract infection by *Enterococcus faecalis* OG1RF. *Infect Immun* **2011**; 79:2901–10.
  27. Hendrickx AP, van Luit-Asbroek M, Schapendonk CM, et al. SgrA, a nidogen-binding LPXTG surface adhesin implicated in biofilm formation, and EcbA, a collagen binding MSCRAMM, are two novel adhesins of hospital-acquired *Enterococcus faecium*. *Infect Immun* **2009**; 77:5097–106.
  28. Tokuyasu KT. A technique for ultracytometry of cell suspensions and tissues. *J Cell Biol* **1973**; 57:551–65.
  29. Sillanpää J, Nallapareddy SR, Singh KV, et al. Characterization of the *ebp<sub>fm</sub>* pilus-encoding operon of *Enterococcus faecium* and its role in biofilm formation and virulence in a murine model of urinary tract infection. *Virulence* **2010**; 1:236–46.
  30. Singh KV, Nallapareddy SR, Murray BE. Importance of the *ebp* (endocarditis- and biofilm-associated pilus) locus in the pathogenesis of *Enterococcus faecalis* ascending urinary tract infection. *J Infect Dis* **2007**; 195:1671–7.
  31. Courtney HS, Li Y, Dale JB, Hasty DL. Cloning, sequencing, and expression of a fibronectin/fibrinogen-binding protein from group A streptococci. *Infect Immun* **1994**; 62:3937–46.
  32. Nallapareddy SR, Murray BE. Role played by serum, a biological cue, in the adherence of *Enterococcus faecalis* to extracellular matrix proteins, collagen, fibrinogen, and fibronectin. *J Infect Dis* **2008**; 197:1728–36.
  33. Schwarz-Linek U, Werner JM, Pickford AR, et al. Pathogenic bacteria attach to human fibronectin through a tandem beta-zipper. *Nature* **2003**; 423:177–81.
  34. Schwarz-Linek U, Höök M, Potts JR. Fibronectin-binding proteins of gram-positive cocci. *Microbes Infect* **2006**; 8:2291–8.
  35. Shinji H, Yosizawa Y, Tajima A, et al. Role of fibronectin-binding proteins A and B in in vitro cellular infections and in vivo septic infections by *Staphylococcus aureus*. *Infect Immun* **2011**; 79:2215–23.
  36. Amelung S, Nerlich A, Rohde M, et al. The FbaB-type fibronectin-binding protein of *Streptococcus pyogenes* promotes specific invasion into endothelial cells. *Cell Microbiol* **2011**; 13:1200–11.
  37. Xiao J, Höök M, Weinstock GM, Murray BE. Conditional adherence of *Enterococcus faecalis* to extracellular matrix proteins. *FEMS Immunol Med Microbiol* **1998**; 21:287–95.
  38. Nallapareddy SR, Qin X, Weinstock GM, Höök M, Murray BE. *Enterococcus faecalis* adhesin, Ace, mediates attachment to extracellular matrix proteins collagen type IV and laminin as well as collagen type I. *Infect Immun* **2000**; 68:5218–24.
  39. Nallapareddy SR, Singh KV, Sillanpää J, et al. Endocarditis and biofilm-associated pili of *Enterococcus faecalis*. *J Clin Invest* **2006**; 116:2799–807.
  40. Noske N, Kämmerer U, Rohde M, Hammerschmidt S. Pneumococcal interaction with human dendritic cells: phagocytosis, survival, and induced adaptive immune response are manipulated by PavA. *J Immunol* **2009**; 183:1952–63.
  41. Vebo HC, Solheim M, Snipen L, Nes IF, Brede DA. Comparative genomic analysis of pathogenic and probiotic *Enterococcus faecalis* isolates, and their transcriptional responses to growth in human urine. *PLoS One* **2010**; 5:e12489.
